# Supplementary material for: Soil carbon, nitrogen, and phosphorus storage in juniper-oak savanna: Role of vegetation and geology
Source: Copernicus journal article supplement (doi:10.5194/egusphere-2023-791), 2023-07-20
Supplement: Supplementary file [file egusphere-2023-791-AC4-supplement.pdf]

**PEDON DESCRIPTION (Trench 1, location 5 m)**

**Print Date:** Jun 11 2019  
**Description Date:** Mar 13 2019  
**Describer:** Ashley Anderson, Travis Waiser, Geraldine Vega  
**Site ID:** S2019TX1370007

**Pedon ID:** S2019TX1370007

**Site Note:**

**Pit Location:**

**Pedon Note:**

**Lab Source ID:**

**Lab Pedon #:**

**User Transect ID:**

**Soil Name as Described/Sampled:** Harper

**Classification:** Clayey, smectitic, thermic Lithic Haplustolls

**Soil Name as Correlated:**

**Classification:**

**Pedon Type:** undefined observation

**Pedon Purpose:** research site

**Taxon Kind:** family

**Associated Soils:**

**Physiographic Division:**

**Physiographic Province:**

**Physiographic Section:**

**State Physiographic Area:**

**Local Physiographic Area:**

**Geomorphic Setting:** on footslope of base slope of ridge on dissected plateau

**Upslope Shape:** concave

**Cross Slope Shape:** linear

**Country:**

**State:** Texas

**County:** Edwards

**MLRA:** 81B -- Edwards Plateau, Central Part

**Soil Survey Area:** TX607 -- Edwards and Real Counties, Texas

**Soil Survey Area:** TX607 -- Edwards and Real Counties, Texas

**Map Unit:**

**Quad Name:** Dunbar Draw SE, Texas

**Std Latitude:** 30.2895833

**Std Longitude:** -100.5594333

**Latitude:** 30 degrees 17 minutes 22.50 seconds north

**Longitude:** 100 degrees 33 minutes 33.96 seconds west

**Datum:** WGS84

**UTM Zone:** 14

**UTM Easting:** 350026 meters

**UTM Northing:** 3351904 meters

**Primary Earth Cover:**

**Secondary Earth Cover:**

**Existing Vegetation:** algerita, live oak, redberry juniper, slim tridens, Texas persimmon, Texas wintergrass

**Parent Material:** alluvium derived from limestone

**Bedrock Kind:**

**Bedrock Depth:**

**Bedrock Hardness:**

**Bedrock Fracture Interval:**

**Particle Size Control Section:** 25 to 44 cm.

**Description origin:** NASIS

**Surface Fragments:**

**Description database:**  
MLRA09\_Temple

**Diagnostic Features:** mollic epipedon 0 to 18 cm.  
cambic horizon 18 to 44 cm.  
lithic contact 44 to cm.

| Top Depth (cm) | Bottom Depth (cm) | Restriction Kind | Restriction Hardness |
|----------------|-------------------|------------------|----------------------|
| 44             |                   | bedrock, lithic  | Indurated            |

**Cont. Site ID:** S2019TX1370007

**Pedon ID:**  
S2019TX1370007

| Slope (%) | Elevation (meters) | Aspect (deg) | MAAT (C) | MSAT (C) | MWAT (C) | MAP (mm) | Frost-Free Days | Drainage Class | Slope Length (meters) | Upslope Length (meters) |
|-----------|--------------------|--------------|----------|----------|----------|----------|-----------------|----------------|-----------------------|-------------------------|
|           | 675.7              |              |          |          |          |          |                 |                |                       |                         |

A--0 to 18 centimeters (0.0 to 7.1 inches); silty clay, very dark brown (10YR 2/2), moist; moderate fine granular structure; slightly hard, friable; common very fine roots throughout and common fine roots throughout; 4 percent nonflat subangular indurated 2 to 75-millimeter Limestone fragments; strong effervescence, by HCl, 1 normal; gradual smooth boundary.

Bw--18 to 44 centimeters (7.1 to 17.3 inches); silty clay, brown (10YR 4/3), moist; weak medium subangular blocky, and moderate fine subangular blocky structure; slightly hard, friable; common very fine roots throughout and common fine roots throughout; 7 percent nonflat subangular indurated 2 to 75-millimeter Limestone fragments; violent effervescence, by HCl, 1 normal; abrupt smooth boundary.

R--44 centimeters (17.3 inches); bedrock; .

## PEDON DESCRIPTION (Trench 1, location 17 m)

**Print Date:** Jun 11 2019

**Description Date:** Mar 13 2019

**Describer:** Ashley Anderson, Travis Waiser, Geraldine Vega

**Site ID:** P2019TX1370005

**Pedon ID:** P2019TX1370005

**Site Note:**

**Pit Location:**

**Pedon Note:**

**Lab Source ID:**

**Lab Pedon #:**

**User Transect ID:**

**Soil Name as Described/Sampled:** Prade

**Classification:** Clayey-skeletal, smectitic, thermic, shallow Petrocalcic Calciustolls

**Soil Name as Correlated:**

**Classification:**

**Pedon Type:** undefined observation

**Pedon Purpose:** research site

**Taxon Kind:** family

**Associated Soils:**

**Physiographic Division:**

**Physiographic Province:**

**Physiographic Section:**

**State Physiographic Area:**

**Local Physiographic Area:**

**Geomorphic Setting:** on backslope of side slope of ridge on dissected plateau

**Upslope Shape:** linear

**Cross Slope Shape:** linear

**Country:**

**State:** Texas

**County:** Edwards

**MLRA:** 81B -- Edwards Plateau, Central Part

**Soil Survey Area:** TX607 -- Edwards and Real Counties, Texas

**Soil Survey Area:** TX607 -- Edwards and Real Counties, Texas

**Map Unit:**

**Quad Name:** Dunbar Draw SE, Texas

**Std Latitude:** 30.2895667

**Std Longitude:** -100.5593000

**Latitude:** 30 degrees 17 minutes 22.44 seconds north

**Longitude:** 100 degrees 33 minutes 33.48 seconds west

**Datum:** WGS84

**UTM Zone:** 14

**UTM Easting:** 350038 meters

**UTM Northing:** 3351902 meters

**Primary Earth Cover:**

**Secondary Earth Cover:**

**Existing Vegetation:** cedar sedge, hairy wedelia, purple threeawn, redberry juniper, Texas bluebonnet

**Parent Material:** residuum weathered from limestone

**Bedrock Kind:**

**Bedrock Depth:**

**Bedrock Hardness:**

**Bedrock Fracture Interval:**

**Particle Size Control Section:** 0 to 34 cm.

**Surface Fragments:** 25.0 percent nonflat subangular indurated 2- to 75-millimeter Limestone fragments and 15.0 percent nonflat subangular indurated 75- to 250-millimeter Limestone fragments

**Description origin:** NASIS

**Description database:** MLRA09\_Temple

**Diagnostic Features:** mollic epipedon 0 to 34 cm.  
petrocalcic horizon 34 to 65 cm.  
lithic contact 65 to cm.

| Top Depth (cm) | Bottom Depth (cm) | Restriction Kind | Restriction Hardness |
|----------------|-------------------|------------------|----------------------|
| 34             | 65                | petrocalcic      | Strongly cemented    |
| 65             |                   | bedrock, lithic  | Indurated            |

**Cont. Site ID:** P2019TX1370005

**Pedon ID:**  
P2019TX1370005

| Slope (%) | Elevation (meters) | Aspect (deg) | MAAT (C) | MSAT (C) | MWAT (C) | MAP (mm) | Frost-Free Days | Drainage Class | Slope Length (meters) | Upslope Length (meters) |
|-----------|--------------------|--------------|----------|----------|----------|----------|-----------------|----------------|-----------------------|-------------------------|
|           | 676.7              |              |          |          |          |          |                 |                |                       |                         |

A--0 to 14 centimeters (0.0 to 5.5 inches); gravelly clay, black (10YR 2/1), moist; moderate fine granular structure; slightly hard, friable; common very fine roots throughout and few medium roots throughout and common fine roots throughout; 5 percent nonflat subangular indurated 75 to 250-millimeter Limestone fragments and 12 percent nonflat subangular indurated 2 to 75-millimeter Limestone fragments; violent effervescence, by HCl, 1 normal; clear smooth boundary.

Bw--14 to 34 centimeters (5.5 to 13.4 inches); very dark grayish brown (10YR 3/2) very gravelly clay, very dark brown (10YR 2/2), moist; moderate fine granular structure; slightly hard, friable; common very fine roots throughout and common medium roots throughout and common fine roots throughout; 20 percent nonflat subangular indurated 75 to 250-millimeter Limestone fragments and 35 percent nonflat subangular indurated 2 to 75-millimeter Limestone fragments; violent effervescence, by HCl, 1 normal; abrupt wavy boundary.

Bkkm--34 to 65 centimeters (13.4 to 25.6 inches); material; few very fine roots throughout and few fine roots throughout; abrupt wavy boundary.

R--65 centimeters (25.6 inches); bedrock; .

## PEDON DESCRIPTION (Trench 1, location 25 m)

**Print Date:** Jun 11 2019

**Description Date:** Mar 13 2019

**Describer:** Ashley Anderson, Travis Waiser, Geraldine Vega

**Site ID:** S2019TX1370004

**Pedon ID:** S2019TX1370004

**Site Note:**

**Pit Location:**

**Pedon Note:**

**Lab Source ID:**

**Lab Pedon #:**

**User Transect ID:**

**Soil Name as Described/Sampled:** Prade

**Classification:** Clayey-skeletal, smectitic, thermic, shallow Petrocalcic Calciustolls

**Soil Name as Correlated:**

**Classification:**

**Pedon Type:** correlates to named soil

**Pedon Purpose:** research site

**Taxon Kind:** series

**Associated Soils:**

**Physiographic Division:**

**Physiographic Province:**

**Physiographic Section:**

**State Physiographic Area:**

**Local Physiographic Area:**

**Geomorphic Setting:** on backslope of side slope of ridge on dissected plateau

**Upslope Shape:** linear

**Cross Slope Shape:** linear

**Country:**

**State:** Texas

**County:** Edwards

**MLRA:** 81B -- Edwards Plateau, Central Part

**Soil Survey Area:** TX607 -- Edwards and Real Counties, Texas

**Soil Survey Area:** TX607 -- Edwards and Real Counties, Texas

**Map Unit:**

**Quad Name:** Dunbar Draw SE, Texas

**Std Latitude:** 30.2895167

**Std Longitude:** -100.5591667

**Latitude:** 30 degrees 17 minutes 22.26 seconds north

**Longitude:** 100 degrees 33 minutes 33.00 seconds west

**Datum:** WGS84

**UTM Zone:** 14

**UTM Easting:** 350051 meters

**UTM Northing:** 3351896 meters

**Primary Earth Cover:**

**Secondary Earth Cover:**

**Existing Vegetation:**

cedar sedge, hairy wedelia, redberry juniper, Texas bluebonnet, Texas pricklypear

**Parent Material:** residuum weathered from limestone

**Bedrock Kind:**

**Bedrock Depth:**

**Bedrock Hardness:**

**Bedrock Fracture Interval:**

**Particle Size Control Section:** 0 to 31 cm.

**Surface Fragments:** 30.0 percent nonflat subangular indurated 2- to 75-millimeter Limestone fragments and 34.0 percent nonflat subangular indurated 75- to 250-millimeter Limestone fragments and 1.0 percent nonflat subangular indurated 250- to 600-millimeter Limestone fragments

**Description origin:** NASIS

**Description database:** MLRA09\_Temple

**Diagnostic Features:** mollic epipedon 0 to 31 cm.  
petrocalcic horizon 31 to 50 cm.  
paralithic contact 50 to cm.

| Top Depth (cm) | Bottom Depth (cm) | Restriction Kind    | Restriction Hardness |
|----------------|-------------------|---------------------|----------------------|
| 31             | 50                | petrocalcic         | Weakly cemented      |
| 50             |                   | bedrock, paralithic | Weakly cemented      |

**Cont. Site ID:** S2019TX1370004

**Pedon ID:** S2019TX1370004

| Slope (%) | Elevation (meters) | Aspect (deg) | MAAT (C) | MSAT (C) | MWAT (C) | MAP (mm) | Frost-Free Days | Drainage Class | Slope Length (meters) | Upslope Length (meters) |
|-----------|--------------------|--------------|----------|----------|----------|----------|-----------------|----------------|-----------------------|-------------------------|
|           | 679.1              |              |          |          |          |          |                 |                |                       |                         |

A--0 to 15 centimeters (0.0 to 5.9 inches); clay, black (10YR 2/1), moist; moderate fine granular structure; slightly hard, friable; common very fine roots throughout and common medium roots throughout and common fine roots throughout; 2 percent nonflat angular indurated 75 to 250-millimeter Limestone fragments and 5 percent nonflat angular indurated 2 to 75-millimeter Limestone fragments; slight effervescence, by HCl, 1 normal; clear wavy boundary.

Bw--15 to 31 centimeters (5.9 to 12.2 inches); extremely gravelly clay, very dark gray (10YR 3/1), moist; moderate fine granular structure; slightly hard, friable; common very fine roots throughout and common medium roots throughout and common fine roots throughout and few coarse roots throughout; 25 percent flat subangular 2 to 150-millimeter Petrocalcic fragments and 40 percent nonflat subangular indurated 2 to 75-millimeter Limestone fragments; strong effervescence, by HCl, 1 normal; abrupt wavy boundary.

Bkkm--31 to 50 centimeters (12.2 to 19.7 inches); cemented material; few very fine roots in cracks and few medium roots in cracks and few fine roots in cracks and few coarse roots in cracks; soil in cracks, ; abrupt wavy boundary.

Cr--50 centimeters (19.7 inches); bedrock; .

## PEDON DESCRIPTION (Trench 2)

**Print Date:** Jun 11 2019

**Description Date:** Mar 13 2019

**Describer:** Ashley Anderson, Travis Waiser, Geraldine Vega

**Site ID:** S2019TX1370009

**Pedon ID:** S2019TX1370009

**Site Note:**

**Pit Location:**

**Pedon Note:**

**Lab Source ID:**

**Lab Pedon #:**

**User Transect ID:**

**Soil Name as Described/Sampled:** Tarrant

**Classification:** Clayey-skeletal, smectitic, thermic Lithic Calcicustolls

**Soil Name as Correlated:**

**Classification:**

**Pedon Type:** correlates to named soil

**Pedon Purpose:** research site

**Taxon Kind:** series

**Associated Soils:**

**Physiographic Division:**

**Physiographic Province:**

**Physiographic Section:**

**State Physiographic Area:**

**Local Physiographic Area:**

**Geomorphic Setting:** on summit of interfluvium of ridge on dissected plateau

**Upslope Shape:** linear

**Cross Slope Shape:** linear

**Country:**

**State:** Texas

**County:** Edwards

**MLRA:** 81B -- Edwards Plateau, Central Part

**Soil Survey Area:** TX607 -- Edwards and Real Counties, Texas

**Soil Survey Area:** TX607 -- Edwards and Real Counties, Texas

**Map Unit:**

**Quad Name:** Dunbar Draw SE, Texas

**Std Latitude:** 30.2895833

**Std Longitude:** -100.5534500

**Latitude:** 30 degrees 17 minutes 22.50 seconds north

**Longitude:** 100 degrees 33 minutes 12.42 seconds west

**Datum:** WGS84

**UTM Zone:** 14

**UTM Easting:** 350601 meters

**UTM Northing:** 3351896 meters

**Primary Earth Cover:**

**Secondary Earth Cover:**

**Existing Vegetation:**

algerita, live oak, redberry juniper, Texas persimmon, Texas pricklypear, Texas wintergrass

**Parent Material:** residuum weathered from limestone

**Bedrock Kind:**

**Bedrock Depth:**

**Bedrock Hardness:**

**Bedrock Fracture Interval:**

**Particle Size Control Section:** 25 to 41 cm.

**Surface Fragments:** 5.0 percent flat indurated 2- to 150-millimeter Limestone fragments

**Description origin:** NASIS

**Description database:** MLRA09\_Temple

**Diagnostic Features:** mollic epipedon 0 to 41 cm.  
calcic horizon 17 to 41 cm.  
lithic contact 41 to cm.

| Top Depth (cm) | Bottom Depth (cm) | Restriction Kind | Restriction Hardness |
|----------------|-------------------|------------------|----------------------|
| 41             |                   | bedrock, lithic  | Indurated            |

**Cont. Site ID:** S2019TX1370009

**Pedon ID:**  
S2019TX1370009

| Slope (%) | Elevation (meters) | Aspect (deg) | MAAT (C) | MSAT (C) | MWAT (C) | MAP (mm) | Frost-Free Days | Drainage Class | Slope Length (meters) | Upslope Length (meters) |
|-----------|--------------------|--------------|----------|----------|----------|----------|-----------------|----------------|-----------------------|-------------------------|
|           | 694.9              |              |          |          |          |          |                 |                |                       |                         |

A--0 to 17 centimeters (0.0 to 6.7 inches); silty clay, black (10YR 2/1), moist; moderate fine subangular blocky parts to moderate fine granular structure; hard, friable; common very fine roots throughout and few medium roots throughout and common fine roots throughout and few coarse roots throughout; 5 percent nonflat subangular indurated 2 to 75-millimeter Limestone fragments; slight effervescence, by HCl, 1 normal; clear wavy boundary.

Ak--17 to 41 centimeters (6.7 to 16.1 inches); very dark gray (10YR 3/1) extremely gravelly clay, black (10YR 2/1), moist; moderate fine subangular blocky parts to moderate fine granular structure; hard, friable; common very fine roots throughout and common medium roots throughout and common fine roots throughout and few coarse roots throughout; 5 percent carbonate nodules on bottom of rock fragments; 15 percent flat indurated 2 to 150-millimeter Limestone fragments and 15 percent flat indurated 150 to 350-millimeter Limestone fragments and 35 percent nonflat subangular indurated 2 to 75-millimeter Limestone fragments; strong effervescence, by HCl, 1 normal; abrupt wavy boundary.

R--41 centimeters (16.1 inches); .



## PEDON DESCRIPTION (Trench 4)

**Print Date:** Jun 11 2019  
**Description Date:** Mar 13 2019  
**Describer:** Ashley Anderson, Travis Waiser, Geraldine Vega  
**Site ID:** P2019TX1370010

**Pedon ID:** P2019TX1370010

**Site Note:**

**Pit Location:**

**Pedon Note:**

**Lab Source ID:**

**Lab Pedon #:**

**User Transect ID:**

**Soil Name as Described/Sampled:** Tarrant

**Classification:** Clayey-skeletal, smectitic, thermic, shallow Typic Calciustolls

**Soil Name as Correlated:**

**Classification:**

**Pedon Type:** taxadjunct to the series

**Pedon Purpose:** research site

**Taxon Kind:** taxadjunct

**Associated Soils:**

**Physiographic Division:**

**Physiographic Province:**

**Physiographic Section:**

**State Physiographic Area:**

**Local Physiographic Area:**

**Geomorphic Setting:** on summit of interfluvium of ridge on dissected plateau

**Upslope Shape:** linear

**Cross Slope Shape:** linear

**Country:**

**State:** Texas

**County:** Edwards

**MLRA:** 81B -- Edwards Plateau, Central Part

**Soil Survey Area:** TX607 -- Edwards and Real Counties, Texas

**Soil Survey Area:** TX607 -- Edwards and Real Counties, Texas

**Map Unit:**

**Quad Name:** Dunbar Draw SE, Texas

**Std Latitude:** 30.2799833

**Std Longitude:** -100.5603667

**Latitude:** 30 degrees 16 minutes 47.94 seconds north

**Longitude:** 100 degrees 33 minutes 37.32 seconds west

**Datum:** WGS84

**UTM Zone:** 14

**UTM Easting:** 349921 meters

**UTM Northing:** 3350841 meters

**Primary Earth Cover:**

**Secondary Earth Cover:**

**Existing Vegetation:** live oak, redberry juniper, sacahuista, Texas pricklypear, Texas wintergrass

**Parent Material:** residuum weathered from limestone

**Bedrock Kind:**

**Bedrock Depth:**

**Bedrock Hardness:**

**Bedrock Fracture Interval:**

**Particle Size Control Section:** 25 to 42 cm.

**Surface Fragments:** 40.0 percent nonflat subangular indurated 2- to 75-millimeter Limestone fragments and 5.0 percent nonflat subangular indurated 75- to 250-millimeter Limestone fragments

**Description origin:** NASIS

**Description database:** MLRA09\_Temple

**Diagnostic Features:** mollic epipedon 0 to 42 cm.  
calcic horizon 16 to 42 cm.  
paralithic contact 42 to cm.

| Top Depth (cm) | Bottom Depth (cm) | Restriction Kind    | Restriction Hardness |
|----------------|-------------------|---------------------|----------------------|
| 42             |                   | bedrock, paralithic | Moderately cemented  |

**Cont. Site ID:** P2019TX1370010

**Pedon ID:**  
P2019TX1370010

| Slope (%) | Elevation (meters) | Aspect (deg) | MAAT (C) | MSAT (C) | MWAT (C) | MAP (mm) | Frost-Free Days | Drainage Class | Slope Length (meters) | Upslope Length (meters) |
|-----------|--------------------|--------------|----------|----------|----------|----------|-----------------|----------------|-----------------------|-------------------------|
|           | 696.8              |              |          |          |          |          |                 |                |                       |                         |

A--0 to 16 centimeters (0.0 to 6.3 inches); clay, black (10YR 2/1), moist; moderate fine granular structure; common very fine roots throughout and common medium roots throughout and common fine roots throughout and few coarse roots throughout; 5 percent nonflat subangular moderately cemented 2 to 75-millimeter Petrocalcic fragments.

Ak--16 to 42 centimeters (6.3 to 16.5 inches); extremely gravelly clay, very dark grayish brown (10YR 3/2), moist; moderate fine granular structure; common very fine roots throughout and few very coarse roots throughout and common medium roots throughout and common fine roots throughout and few coarse roots throughout; 5 percent carbonate nodules on bottom of rock fragments; 20 percent flat moderately cemented 2 to 150-millimeter Petrocalcic fragments and 20 percent flat moderately cemented 150 to 380-millimeter Petrocalcic fragments and 25 percent nonflat subangular moderately cemented 2 to 75-millimeter Petrocalcic fragments.

Cr--42 centimeters (16.5 inches); bedrock; .

## PEDON DESCRIPTION (Trench 5A, location 10 m)

**Print Date:** Jun 11 2019

**Description Date:** Mar 14 2019

**Describer:** Ashley Anderson, Travis Waiser, Geraldine Vega

**Site ID:** S2019TX1370013

**Pedon ID:** S2019TX1370013

**Site Note:**

**Pit Location:**

**Pedon Note:**

**Lab Source ID:**

**Lab Pedon #:**

**User Transect ID:**

**Soil Name as Described/Sampled:** Ozona

**Classification:** Loamy, mixed, superactive, thermic, shallow Petrocalcic Calciustolls

**Soil Name as Correlated:**

**Classification:**

**Pedon Type:** correlates to named soil

**Pedon Purpose:** research site

**Taxon Kind:** series

**Associated Soils:**

**Physiographic Division:**

**Physiographic Province:**

**Physiographic Section:**

**State Physiographic Area:**

**Local Physiographic Area:**

**Geomorphic Setting:** on backslope of side slope of ridge on dissected plateau

**Upslope Shape:** linear

**Cross Slope Shape:** convex

**Country:**

**State:** Texas

**County:** Edwards

**MLRA:** 81B -- Edwards Plateau, Central Part

**Soil Survey Area:** TX607 -- Edwards and Real Counties, Texas

**Soil Survey Area:** TX607 -- Edwards and Real Counties, Texas

**Map Unit:**

**Quad Name:** Dunbar Draw SE, Texas

**Std Latitude:** 30.2553056

**Std Longitude:** -100.5723333

**Latitude:** 30 degrees 15 minutes 19.10 seconds north

**Longitude:** 100 degrees 34 minutes 20.40 seconds west

**Datum:** WGS84

**UTM Zone:** 14

**UTM Easting:** 348732 meters

**UTM Northing:** 3348122 meters

**Primary Earth Cover:**

**Secondary Earth Cover:**

**Existing Vegetation:** cedar sedge, purple threeawn, redberry juniper

**Parent Material:** residuum weathered from limestone

**Bedrock Kind:**

**Bedrock Depth:**

**Bedrock Hardness:**

**Bedrock Fracture Interval:**

**Particle Size Control Section:** 0 to 34 cm.

**Surface Fragments:** 5.0 percent nonflat subangular strongly cemented 2- to 75-millimeter Limestone fragments and 5.0 percent nonflat subangular strongly cemented 75- to 250-millimeter Limestone fragments

**Description origin:** NASIS

**Description database:** MLRA09\_Temple

**Diagnostic Features:** mollic epipedon 0 to 34 cm.  
petrocalcic horizon 34 to 37 cm.  
paralithic contact 37 to 200 cm.

| Top Depth (cm) | Bottom Depth (cm) | Restriction Kind    | Restriction Hardness |
|----------------|-------------------|---------------------|----------------------|
| 34             | 37                | petrocalcic         | Moderately cemented  |
| 37             | 200               | bedrock, paralithic | Weakly cemented      |

**Cont. Site ID:** S2019TX1370013

**Pedon ID:**  
S2019TX1370013

| Slope (%) | Elevation (meters) | Aspect (deg) | MAAT (C) | MSAT (C) | MWAT (C) | MAP (mm) | Frost-Free Days | Drainage Class | Slope Length (meters) | Upslope Length (meters) |
|-----------|--------------------|--------------|----------|----------|----------|----------|-----------------|----------------|-----------------------|-------------------------|
|           | 685.5              |              |          |          |          |          |                 |                |                       |                         |

A1--0 to 20 centimeters (0.0 to 7.9 inches); very dark grayish brown (10YR 3/2) silty clay loam, very dark brown (10YR 2/2), moist; moderate medium granular structure; slightly hard, friable; common very fine roots throughout and few medium roots throughout and common fine roots throughout; 8 percent nonflat subangular indurated 2 to 75-millimeter Limestone fragments; violent effervescence, by HCl, 1 normal; clear wavy boundary.

A2--20 to 34 centimeters (7.9 to 13.4 inches); dark grayish brown (10YR 4/2) extremely channery silty clay loam, very dark brown (10YR 2/2), moist; moderate medium granular structure; slightly hard, friable; common very fine roots throughout and common medium roots throughout and common fine roots throughout and common coarse roots throughout; 30 percent nonflat subangular indurated 2 to 75-millimeter Limestone fragments and 35 percent flat angular indurated 2 to 150-millimeter Limestone fragments; violent effervescence, by HCl, 1 normal; clear wavy boundary.

Bkkm--34 to 37 centimeters (13.4 to 14.6 inches); material; clear wavy boundary.

Cr--37 to 200 centimeters (14.6 to 78.7 inches); bedrock; very few very fine roots throughout and few medium roots throughout and very few fine roots throughout; Small pocket at 100 to 130 cm of soil material in Cr was silty clay with 17% sand, 42% silt, and 41% clay.

**PEDON DESCRIPTION (Trench 5A, location 18 m)**

**Print Date:** Jun 11 2019  
**Description Date:** Mar 14 2019  
**Describer:** Ashley Anderson, Travis Waiser, Geraldine Vega  
**Site ID:** P2019TX1370014

**Pedon ID:** P2019TX1370014

**Site Note:**

**Pit Location:**

**Pedon Note:**

**Lab Source ID:**

**Lab Pedon #:**

**User Transect ID:**

**Soil Name as Described/Sampled:** Prade

**Classification:** Clayey-skeletal, smectitic, thermic, shallow Petrocalcic Calciustolls

**Soil Name as Correlated:**

**Classification:**

**Pedon Type:** correlates to named soil

**Pedon Purpose:** research site

**Taxon Kind:** series

**Associated Soils:**

**Physiographic Division:**

**Physiographic Province:**

**Physiographic Section:**

**State Physiographic Area:**

**Local Physiographic Area:**

**Geomorphic Setting:** on backslope of side slope of ridge on dissected plateau

**Upslope Shape:** linear

**Cross Slope Shape:** convex

**Country:**

**State:** Texas

**County:** Edwards

**MLRA:** 81B -- Edwards Plateau, Central Part

**Soil Survey Area:** TX607 -- Edwards and Real Counties, Texas

**Soil Survey Area:** TX607 -- Edwards and Real Counties, Texas

**Map Unit:**

**Quad Name:** Dunbar Draw SE, Texas

**Std Latitude:** 30.2555833

**Std Longitude:** -100.5726389

**Latitude:** 30 degrees 15 minutes 20.10 seconds north

**Longitude:** 100 degrees 34 minutes 21.50 seconds west

**Datum:** WGS84

**UTM Zone:** 14

**UTM Easting:** 348703 meters

**UTM Northing:** 3348153 meters

**Primary Earth Cover:**

**Secondary Earth Cover:**

**Existing Vegetation:** cedar sedge, purple threeawn, redberry juniper

**Parent Material:** residuum weathered from limestone

**Bedrock Kind:**

**Bedrock Depth:**

**Bedrock Hardness:**

**Bedrock Fracture Interval:**

**Particle Size Control Section:** 25 to 41 cm.

**Surface Fragments:** 5.0 percent nonflat subangular strongly cemented 2- to 75-millimeter Limestone fragments and 5.0 percent nonflat subangular strongly cemented 75- to 250-millimeter Limestone fragments

**Description origin:** NASIS

**Description database:** MLRA09\_Temple

**Diagnostic Features:** mollic epipedon 0 to 41 cm.  
petrocalcic horizon 41 to 43 cm.  
paralithic materials 43 to 86 cm.

| Top Depth (cm) | Bottom Depth (cm) | Restriction Kind    | Restriction Hardness |
|----------------|-------------------|---------------------|----------------------|
| 41             | 43                | petrocalcic         | Strongly cemented    |
| 43             | 86                | bedrock, paralithic | Moderately cemented  |

**Cont. Site ID:** P2019TX1370014

**Pedon ID:**  
P2019TX1370014

| Slope (%) | Elevation (meters) | Aspect (deg) | MAAT (C) | MSAT (C) | MWAT (C) | MAP (mm) | Frost-Free Days | Drainage Class | Slope Length (meters) | Upslope Length (meters) |
|-----------|--------------------|--------------|----------|----------|----------|----------|-----------------|----------------|-----------------------|-------------------------|
|           | 691.0              |              |          |          |          |          |                 |                |                       |                         |

A1--0 to 21 centimeters (0.0 to 8.3 inches); very dark grayish brown (10YR 3/2) clay, very dark brown (10YR 2/2), moist; moderate medium granular structure; slightly hard, friable; common very fine roots throughout and few medium roots throughout and common fine roots throughout; 6 percent nonflat subangular indurated 2 to 75-millimeter Limestone fragments; violent effervescence, by HCl, 1 normal; clear wavy boundary.

A2--21 to 41 centimeters (8.3 to 16.1 inches); dark grayish brown (10YR 4/2) extremely gravelly clay, very dark brown (10YR 2/2), moist; moderate medium granular structure; slightly hard, friable; common very fine roots throughout and few very coarse roots throughout and few medium roots throughout and common fine roots throughout and few coarse roots throughout; 10 percent flat angular moderately cemented 2 to 150-millimeter Petrocalcic fragments and 25 percent flat angular moderately cemented 150 to 350-millimeter Petrocalcic fragments and 30 percent nonflat subangular indurated 2 to 75-millimeter Limestone fragments; violent effervescence, by HCl, 1 normal; clear wavy boundary.

Bkkm--41 to 43 centimeters (16.1 to 16.9 inches); material; clear wavy boundary.

Cr--43 to 86 centimeters (16.9 to 33.9 inches); bedrock; .

## PEDON DESCRIPTION (Trench 5B)

**Print Date:** Jun 11 2019  
**Description Date:** Mar 14 2019  
**Describer:** Ashley Anderson, Travis Waiser, Geraldine Vega  
**Site ID:** S2019TX1370012

**Pedon ID:** S2019TX1370012

**Site Note:**

**Pit Location:**

**Pedon Note:**

**Lab Source ID:**

**Lab Pedon #:**

**User Transect ID:**

**Soil Name as Described/Sampled:** Rio Diablo

**Classification:** Fine, mixed, superactive, thermic Pachic Haplustolls

**Soil Name as Correlated:**

**Classification:**

**Pedon Type:** taxadjunct to the series

**Pedon Purpose:** research site

**Taxon Kind:** taxadjunct

**Associated Soils:**

**Physiographic Division:**

**Physiographic Province:**

**Physiographic Section:**

**State Physiographic Area:**

**Local Physiographic Area:**

**Geomorphic Setting:** on footslope of base slope of ridge on dissected plateau

**Upslope Shape:** concave

**Cross Slope Shape:** linear

**Country:**

**State:** Texas

**County:** Edwards

**MLRA:** 81B -- Edwards Plateau, Central Part

**Soil Survey Area:** TX607 -- Edwards and Real Counties, Texas

**Soil Survey Area:** TX607 -- Edwards and Real Counties, Texas

**Map Unit:**

**Quad Name:** Dunbar Draw SE, Texas

**Std Latitude:** 30.2552500

**Std Longitude:** -100.5721667

**Latitude:** 30 degrees 15 minutes 18.90 seconds north

**Longitude:** 100 degrees 34 minutes 19.80 seconds west

**Datum:** WGS84

**UTM Zone:** 14

**UTM Easting:** 348748 meters

**UTM Northing:** 3348115 meters

**Primary Earth Cover:**

**Secondary Earth Cover:**

**Existing Vegetation:**

Christmas cactus, honey mesquite, redberry juniper, Texas pricklypear

**Parent Material:** alluvium derived from limestone

**Bedrock Kind:**

**Bedrock Depth:**

**Bedrock Hardness:**

**Bedrock Fracture Interval:**

**Particle Size Control Section:** 25 to 100 cm.

**Surface Fragments:** 2.0 percent nonflat subrounded indurated 2- to 75-millimeter Limestone fragments

**Description origin:** NASIS

**Description database:** MLRA09\_Temple

**Diagnostic Features:** mollic epipedon 0 to 60 cm.  
cambic horizon 60 to 118 cm.  
paralithic materials 118 to 147 cm.

| Top Depth (cm) | Bottom Depth (cm) | Restriction Kind    | Restriction Hardness |
|----------------|-------------------|---------------------|----------------------|
| 118            | 147               | bedrock, paralithic | Moderately cemented  |

**Cont. Site ID:** S2019TX1370012

**Pedon ID:** S2019TX1370012

| Slope (%) | Elevation (meters) | Aspect (deg) | MAAT (C) | MSAT (C) | MWAT (C) | MAP (mm) | Frost-Free Days | Drainage Class | Slope Length (meters) | Upslope Length (meters) |
|-----------|--------------------|--------------|----------|----------|----------|----------|-----------------|----------------|-----------------------|-------------------------|
|           | 691.0              |              |          |          |          |          |                 |                |                       |                         |

A1--0 to 18 centimeters (0.0 to 7.1 inches); very dark grayish brown (10YR 3/2) silty clay loam, very dark brown (10YR 2/2), moist; weak medium subangular blocky parts to moderate fine granular structure; slightly hard, friable; common very fine roots throughout and common fine roots throughout; 2 percent nonflat subangular indurated 2 to 20-millimeter Limestone fragments; violent effervescence, by HCl, 1 normal; clear smooth boundary.

A2--18 to 35 centimeters (7.1 to 13.8 inches); very dark grayish brown (10YR 3/2) silty clay, very dark brown (10YR 2/2), moist; weak medium subangular blocky parts to moderate fine granular structure; slightly hard, friable; common very fine roots throughout and few medium roots throughout and common fine roots throughout; 4 percent nonflat subangular indurated 2 to 20-millimeter Limestone fragments; violent effervescence, by HCl, 1 normal; clear smooth boundary.

Bw--35 to 60 centimeters (13.8 to 23.6 inches); brown (7.5YR 4/3) silty clay, dark brown (10YR 3/3), moist; moderate medium subangular blocky structure; hard, firm; common very fine roots throughout and few medium roots throughout and common fine roots throughout and few coarse roots throughout; common very fine tubular pores; 6 percent nonflat subangular indurated 2 to 75-millimeter Limestone fragments; violent effervescence, by HCl, 1 normal; gradual wavy boundary.

Bk1--60 to 92 centimeters (23.6 to 36.2 inches); brown (7.5YR 4/4) silty clay, brown (7.5YR 4/4), moist; weak medium subangular blocky parts to moderate fine subangular blocky structure; hard, firm; common very fine roots throughout and few medium roots throughout and common fine roots throughout and few coarse roots throughout; common very fine tubular pores; 2 percent fine threadlike carbonate masses throughout; 8 percent nonflat subangular indurated 2 to 75-millimeter Limestone fragments; violent



effervescence, by HCl, 1 normal; gradual wavy boundary.

Bk2--92 to 118 centimeters (36.2 to 46.5 inches); strong brown (7.5YR 5/6) silty clay, strong brown (7.5YR 5/6), moist; moderate fine subangular blocky structure; hard, firm; few very fine roots throughout and few medium roots throughout and few fine roots throughout; common very fine tubular and common fine tubular pores; 4 percent fine threadlike carbonate masses throughout; 8 percent nonflat subangular indurated 2 to 75-millimeter Limestone fragments; violent effervescence, by HCl, 1 normal.

Cr--118 to 147 centimeters (46.5 to 57.9 inches); bedrock; few fine roots throughout; violent effervescence, by HCl, 1 normal.

**PEDON DESCRIPTION (Trench 6, location 4 m)**

**Print Date:** Jun 11 2019  
**Description Date:** Mar 12 2019  
**Describer:** Ashley Anderson, Travis Waiser, Geraldine Vega  
**Site ID:** P2019TX1370002

**Pedon ID:** P2019TX1370002

**Site Note:**

**Pit Location:**

**Pedon Note:**

**Lab Source ID:**

**Lab Pedon #:**

**User Transect ID:**

**Soil Name as Described/Sampled:** Mereta

**Classification:** Clayey, mixed, superactive, thermic, shallow Petrocalcic Calciustolls

**Soil Name as Correlated:**

**Classification:**

**Pedon Type:** correlates to named soil

**Pedon Purpose:** research site

**Taxon Kind:** series

**Associated Soils:**

**Physiographic Division:**

**Physiographic Province:**

**Physiographic Section:**

**State Physiographic Area:**

**Local Physiographic Area:**

**Geomorphic Setting:** on toeslope of base slope of ridge on dissected plateau

**Upslope Shape:** linear

**Cross Slope Shape:** linear

**Country:**

**State:** Texas

**County:** Edwards

**MLRA:** 81B -- Edwards Plateau, Central Part

**Soil Survey Area:** TX607 -- Edwards and Real Counties, Texas

**Soil Survey Area:** TX607 -- Edwards and Real Counties, Texas

**Map Unit:**

**Quad Name:** Dunbar Draw SE, Texas

**Std Latitude:** 30.2833000

**Std Longitude:** -100.5410667

**Latitude:** 30 degrees 16 minutes 59.88 seconds north

**Longitude:** 100 degrees 32 minutes 27.84 seconds west

**Datum:** WGS84

**UTM Zone:** 14

**UTM Easting:** 351783 meters

**UTM Northing:** 3351183 meters

**Primary Earth Cover:**

**Secondary Earth Cover:**

**Existing Vegetation:**

honey mesquite, live oak, redberry juniper, Texas pricklypear, Texas wintergrass

**Parent Material:** alluvium derived from limestone

**Bedrock Kind:**

**Bedrock Depth:**

**Bedrock Hardness:**

**Bedrock Fracture Interval:**

**Particle Size Control Section:** 25 to 39 cm.

**Surface Fragments:** 5.0 percent nonflat subangular indurated 2- to 75-millimeter Limestone fragments and 5.0 percent nonflat subangular indurated 75- to 250-millimeter Limestone fragments

**Description origin:** NASIS

**Description database:** MLRA09\_Temple

**Diagnostic Features:** mollic epipedon 0 to 39 cm.  
petrocalcic horizon 39 to 65 cm.  
cambic horizon 65 to 145 cm.  
paralithic contact 145 to 155 cm.

| Top Depth (cm) | Bottom Depth (cm) | Restriction Kind    | Restriction Hardness |
|----------------|-------------------|---------------------|----------------------|
| 39             | 65                | petrocalcic         | Strongly cemented    |
| 145            | 155               | bedrock, paralithic | Weakly cemented      |

**Cont. Site ID:** P2019TX1370002

**Pedon ID:**  
P2019TX1370002

| Slope (%) | Elevation (meters) | Aspect (deg) | MAAT (C) | MSAT (C) | MWAT (C) | MAP (mm) | Frost-Free Days | Drainage Class | Slope Length (meters) | Upslope Length (meters) |
|-----------|--------------------|--------------|----------|----------|----------|----------|-----------------|----------------|-----------------------|-------------------------|
|           | 644.3              |              |          |          |          |          |                 |                |                       |                         |

A1--0 to 20 centimeters (0.0 to 7.9 inches); very dark gray (10YR 3/1) clay, very dark brown (10YR 2/2), moist; moderate medium subangular blocky, and moderate fine subangular blocky structure; slightly hard, friable; common very fine roots throughout and few medium roots throughout and common fine roots throughout; 8 percent nonflat subrounded indurated 2 to 75-millimeter Limestone fragments; violent effervescence, by HCl, 1 normal; clear smooth boundary.

A2--20 to 39 centimeters (7.9 to 15.4 inches); dark grayish brown (10YR 4/2) gravelly clay, dark brown (10YR 3/3), moist; moderate fine subangular blocky structure; hard, firm; common very fine roots throughout and few very coarse roots throughout and common medium roots throughout and common fine roots throughout and few coarse roots throughout; 1 percent nonflat subrounded indurated 75 to 250-millimeter Limestone fragments and 15 percent nonflat subangular indurated 2 to 75-millimeter Limestone fragments; violent effervescence, by HCl, 1 normal; clear wavy boundary.

Bkkm--39 to 65 centimeters (15.4 to 25.6 inches); cemented material; few very fine roots throughout and few medium roots throughout and few fine roots throughout; violent effervescence, by HCl, 1 normal; abrupt wavy boundary.

Bk1--65 to 107 centimeters (25.6 to 42.1 inches); brown (7.5YR 4/3) clay, brown (7.5YR 4/3), moist; weak fine subangular blocky structure; slightly hard, friable; common very fine roots throughout and few very coarse roots throughout and common fine roots throughout and few coarse roots throughout; 3 percent fine threadlike carbonate masses; 2 percent nonflat subrounded indurated 75 to 250-millimeter Limestone fragments and 10 percent nonflat subrounded indurated 2 to 75-millimeter Limestone fragments; violent effervescence, by HCl, 1 normal; clear wavy boundary.

Bk2--107 to 145 centimeters (42.1 to 57.1 inches); light brown (7.5YR 6/4) clay, brown (7.5YR 5/4), moist; weak fine subangular blocky structure; slightly hard, friable; common very fine roots throughout and few medium roots throughout and common fine roots throughout and few coarse roots throughout; 3 percent fine threadlike carbonate masses; 1 percent nonflat subrounded indurated 75 to 250-millimeter Limestone fragments and 8 percent nonflat subrounded indurated 2 to 75-millimeter Limestone fragments; violent effervescence, by HCl, 1 normal; abrupt wavy boundary.

Cr--145 to 155 centimeters (57.1 to 61.0 inches); bedrock; violent effervescence, by HCl, 1 normal.

**PEDON DESCRIPTION (Trench 6, location 6 m)**

**Print Date:** Jun 11 2019  
**Description Date:** Mar 12 2019  
**Describer:** Ashley Anderson, Travis Waiser, Geraldine Vega  
**Site ID:** S2019TX1370001

**Pedon ID:** S2019TX1370001

**Site Note:**

**Pit Location:**

**Pedon Note:**

**Lab Source ID:**

**Lab Pedon #:**

**User Transect ID:**

**Soil Name as Described/Sampled:** Mereta

**Classification:** Clayey, mixed, superactive, thermic, shallow Petrocalcic Calciustolls

**Soil Name as Correlated:**

**Classification:**

**Pedon Type:** correlates to named soil

**Pedon Purpose:** research site

**Taxon Kind:** series

**Associated Soils:**

**Physiographic Division:**

**Physiographic Province:**

**Physiographic Section:**

**State Physiographic Area:**

**Local Physiographic Area:**

**Geomorphic Setting:** on toeslope of base slope of ridge on dissected plateau

**Upslope Shape:** linear

**Country:**

**State:** Texas

**County:** Edwards

**MLRA:** 81B -- Edwards Plateau, Central Part

**Soil Survey Area:** TX607 -- Edwards and Real Counties, Texas

**Soil Survey Area:** TX607 -- Edwards and Real Counties, Texas

**Map Unit:**

**Quad Name:** Dunbar Draw SE, Texas

**Std Latitude:** 30.2833833

**Std Longitude:** -100.5411167

**Latitude:** 30 degrees 17 minutes 0.18 seconds north

**Longitude:** 100 degrees 32 minutes 28.02 seconds west

**Datum:** WGS84

**UTM Zone:** 14

**UTM Easting:** 351778 meters

**UTM Northing:** 3351193 meters

**Primary Earth Cover:** Grass/herbaceous cover

**Secondary Earth Cover:** Savanna rangeland

**Existing Vegetation:** honey mesquite, live oak, redberry juniper, Texas pricklypear, Texas wintergrass

**Parent Material:** alluvium derived from limestone

**Bedrock Kind:**

**Bedrock Depth:**

**Bedrock Hardness:**

**Cross Slope Shape:** linear

**Particle Size Control Section:** 25 to 43 cm.

**Description origin:** NASIS

**Diagnostic Features:** mollic epipedon 0 to 43 cm.  
petrocalcic horizon 43 to 55 cm.

**Bedrock Fracture Interval:**

**Surface Fragments:** 5.0 percent nonflat subangular indurated 2- to 75-millimeter Limestone fragments and 5.0 percent nonflat subangular indurated 75- to 250-millimeter Limestone fragments

**Description database:** MLRA09\_Temple

| Top Depth (cm) | Bottom Depth (cm) | Restriction Kind | Restriction Hardness |
|----------------|-------------------|------------------|----------------------|
| 43             | 55                | petrocalcic      | Weakly cemented      |

**Cont. Site ID:** S2019TX1370001

**Pedon ID:** S2019TX1370001

| Slope (%) | Elevation (meters) | Aspect (deg) | MAAT (C) | MSAT (C) | MWAT (C) | MAP (mm) | Frost-Free Days | Drainage Class | Slope Length (meters) | Upslope Length (meters) |
|-----------|--------------------|--------------|----------|----------|----------|----------|-----------------|----------------|-----------------------|-------------------------|
|           | 638.6              |              |          |          |          |          |                 |                |                       |                         |

A1--0 to 23 centimeters (0.0 to 9.1 inches); very dark grayish brown (10YR 3/2) clay, very dark brown (10YR 2/2), moist; moderate medium subangular blocky, and moderate fine subangular blocky structure; slightly hard, friable; common very fine roots throughout and common medium roots throughout and common fine roots throughout and few coarse roots throughout; few fine tubular pores; 8 percent nonflat subrounded indurated 2 to 75-millimeter Limestone fragments; violent effervescence, by HCl, 1 normal; gradual smooth boundary.

A2--23 to 43 centimeters (9.1 to 16.9 inches); dark grayish brown (10YR 4/2) clay, dark brown (10YR 3/3), moist; moderate medium subangular blocky structure; hard, firm; common very fine roots throughout and very few very coarse roots throughout and common medium roots throughout and few fine roots throughout and few coarse roots throughout; 1 percent nonflat subangular indurated 75 to 255-millimeter Limestone fragments and 8 percent nonflat subrounded indurated 2 to 75-millimeter Limestone fragments; violent effervescence, by HCl, 1 normal; abrupt wavy boundary.

Bkkm--43 to 55 centimeters (16.9 to 21.7 inches); cemented material; few very fine roots in cracks and few fine roots in cracks; violent effervescence, by HCl, 1 normal; gradual wavy boundary.

Ck1--55 to 125 centimeters (21.7 to 49.2 inches); pink (7.5YR 8/3) material; few very fine roots in cracks

and few medium roots in cracks and few fine roots in cracks; violent effervescence, by HCl, 1 normal; gradual wavy boundary.

Ck2--125 to 180 centimeters (49.2 to 70.9 inches); pink (7.5YR 8/3) material; few very fine roots in cracks and few medium roots in cracks and few fine roots in cracks; 10 percent coarse carbonate masses and 10 percent coarse carbonate nodules; violent effervescence, by HCl, 1 normal.

**PEDON DESCRIPTION (Trench 6, location 8 m)**

**Print Date:** Jun 11 2019

**Description Date:** Mar 12 2019

**Describer:** Ashley Anderson, Travis Waiser, Geraldine Vega

**Site ID:** S2019TX1370003

**Pedon ID:** S2019TX1370003

**Site Note:**

**Pit Location:**

**Pedon Note:**

**Lab Source ID:**

**Lab Pedon #:**

**User Transect ID:**

**Soil Name as Described/Sampled:** Rio Diablo

**Classification:** Fine, mixed, superactive, thermic Aridic Haplustolls

**Soil Name as Correlated:**

**Classification:**

**Pedon Type:** correlates to named soil

**Pedon Purpose:** research site

**Taxon Kind:** series

**Associated Soils:**

**Physiographic Division:**

**Physiographic Province:**

**Physiographic Section:**

**State Physiographic Area:**

**Local Physiographic Area:**

**Geomorphic Setting:** on toeslope of base slope of ridge on dissected plateau

**Upslope Shape:** linear

**Cross Slope Shape:** linear

**Country:**

**State:** Texas

**County:** Edwards

**MLRA:** 81B -- Edwards Plateau, Central Part

**Soil Survey Area:** TX607 -- Edwards and Real Counties, Texas

**Soil Survey Area:** TX607 -- Edwards and Real Counties, Texas

**Map Unit:**

**Quad Name:** Dunbar Draw SE, Texas

**Std Latitude:** 30.2834000

**Std Longitude:** -100.5411667

**Latitude:** 30 degrees 17 minutes 0.24 seconds north

**Longitude:** 100 degrees 32 minutes 28.20 seconds west

**Datum:** WGS84

**UTM Zone:** 14

**UTM Easting:** 351773 meters

**UTM Northing:** 3351195 meters

**Primary Earth Cover:**

**Secondary Earth Cover:**

**Existing Vegetation:** curly-mesquite, honey mesquite, redberry juniper, Texas pricklypear, Texas wintergrass

**Parent Material:** alluvium derived from limestone

**Bedrock Kind:**

**Bedrock Depth:**

**Bedrock Hardness:**

**Bedrock Fracture Interval:**



**Particle Size Control Section:** 25 to 100 cm.

**Surface Fragments:** 5.0 percent nonflat subangular indurated 2- to 75-millimeter Limestone fragments and 5.0 percent nonflat subangular indurated 75- to 250-millimeter Limestone fragments

**Description origin:** NASIS

**Description database:** MLRA09\_Temple

**Diagnostic Features:** mollic epipedon 0 to 29 cm.  
cambic horizon 29 to 120 cm.

**Cont. Site ID:** S2019TX1370003

**Pedon ID:** S2019TX1370003

| Slope (%) | Elevation (meters) | Aspect (deg) | MAAT (C) | MSAT (C) | MWAT (C) | MAP (mm) | Frost-Free Days | Drainage Class | Slope Length (meters) | Upslope Length (meters) |
|-----------|--------------------|--------------|----------|----------|----------|----------|-----------------|----------------|-----------------------|-------------------------|
|           | 675.4              |              |          |          |          |          |                 |                |                       |                         |

A--0 to 29 centimeters (0.0 to 11.4 inches); very dark gray (10YR 3/1) silty clay, black (10YR 2/1), moist; strong fine subangular blocky parts to moderate fine granular structure; slightly hard, friable; common very fine roots throughout and common fine roots throughout; 4 percent nonflat subrounded indurated 2 to 75-millimeter Limestone fragments; violent effervescence, by HCl, 1 normal; clear smooth boundary.

Bw--29 to 61 centimeters (11.4 to 24.0 inches); brown (7.5YR 4/3) clay, brown (7.5YR 4/3), moist; moderate medium subangular blocky, and moderate medium angular blocky structure; hard, firm; common very fine roots throughout and few medium roots throughout and common fine roots throughout; 8 percent nonflat subrounded indurated 2 to 75-millimeter Limestone fragments; violent effervescence, by HCl, 1 normal; clear smooth boundary.

Bk1--61 to 100 centimeters (24.0 to 39.4 inches); weak red (7.5R 4/3) clay, brown (7.5YR 4/3), moist; moderate medium prismatic structure; hard, firm; common very fine roots throughout and common fine roots throughout; 4 percent fine threadlike carbonate masses; 1 percent nonflat subrounded indurated 75 to 250-millimeter Limestone fragments and 10 percent nonflat subrounded indurated 2 to 75-millimeter Limestone fragments; violent effervescence, by HCl, 1 normal; clear smooth boundary.

Bk2--100 to 120 centimeters (39.4 to 47.2 inches); light brown (7.5YR 6/4) clay, red (7.5R 5/6), moist; weak medium subangular blocky structure; hard, firm; few very fine roots throughout and few fine roots throughout; 3 percent fine spherical carbonate masses; 1 percent nonflat subrounded indurated 75 to 250-millimeter Limestone fragments and 8 percent nonflat subrounded indurated 2 to 75-millimeter Limestone fragments; violent effervescence, by HCl, 1 normal.
